# Supplementary material for: Blue-LED activated photocatalytic hydrogenation of nitroarenes with Cu2O/CuO heterojunctions
Source: Royal Society of Chemistry journal article supplement (doi:10.1039/d3dt01670f), 2023-01-01
Supplement: d3dt01670f1.pdf [file d3dt01670f1.pdf]

## Supporting Information

# Blue-LED activated photocatalytic hydrogenation of nitroarenes with $\text{Cu}_2\text{O}/\text{CuO}$ heterojunctions

Ignacio Chamorro-Mena, Noemí Linares\*, Javier García-Martínez\*

*Laboratorio de Nanotecnología Molecular. Departamento de Química Inorgánica. Universidad de Alicante, Spain.*

### List of Figures and Tables

|             |                                                                                                         |    |
|-------------|---------------------------------------------------------------------------------------------------------|----|
| -           | Electronic microscopy of as synthesized copper oxides:                                                  |    |
| Figure S1.  | TEM micrographs and SAED of as-synthesized copper oxides                                                | 3  |
| -           | Textural properties of the materials:                                                                   |    |
| Figure S2.  | $\text{N}_2$ physisorption isotherms of the MOF precursor and the different catalysts                   | 4  |
| -           | Photocatalytic vs catalytic performance of the as-synthesized copper oxides:                            |    |
| Figure S3.  | Performance of $\text{Cu}_2\text{O}/\text{CuO} = 0.42$                                                  | 5  |
| Figure S4.  | Performance of $\text{Cu}_2\text{O}/\text{CuO} = 0.15$                                                  | 6  |
| Figure S5.  | Performance of $\text{Cu}_2\text{O}/\text{CuO} = 0.01$                                                  | 7  |
| -           | XPS spectra after 1 photocatalytic cycle:                                                               |    |
| Figure S6.  | $\text{Cu}2\text{p}_{3/2}$ XPS spectra of the catalysts after one photocatalytic cycle                  | 8  |
| Figure S7.  | Cu LMM spectra of the catalysts after 1 cycle of photoreduction                                         | 9  |
| Figure S8.  | O1s XPS spectra before and after one photocatalytic cycle                                               | 10 |
| Table S1.   | Distribution of oxygen on the catalysts' surface after 1 photocatalytic cycle.                          | 10 |
| -           | Hydrolysis of sodium borohydride evaluation:                                                            |    |
| Figure S9.  | Volume of generated $\text{H}_2$ vs time plot using $\text{Cu}_2\text{O}/\text{CuO} = 0.15$ as catalyst | 11 |
| Figure S10. | XPS $\text{Cu}2\text{p}_3$ spectra of the best performing catalyst after each catalytic cycle           | 11 |

|                                                                                  |    |
|----------------------------------------------------------------------------------|----|
| - Selectivity evaluation:                                                        |    |
| Figure S11. 2-nitrophenol 12 minutes photoreduction to 2-aminophenol             | 12 |
| Figure S12. 4-nitrobenzamide 12 minutes photoreduction to 4-aminebenzamide       | 13 |
| Figure S13. 4-nitrobenzoic acid 12 minutes photoreduction to 4-aminobenzoic acid | 14 |
| <br>                                                                             |    |
| - References                                                                     | 15 |

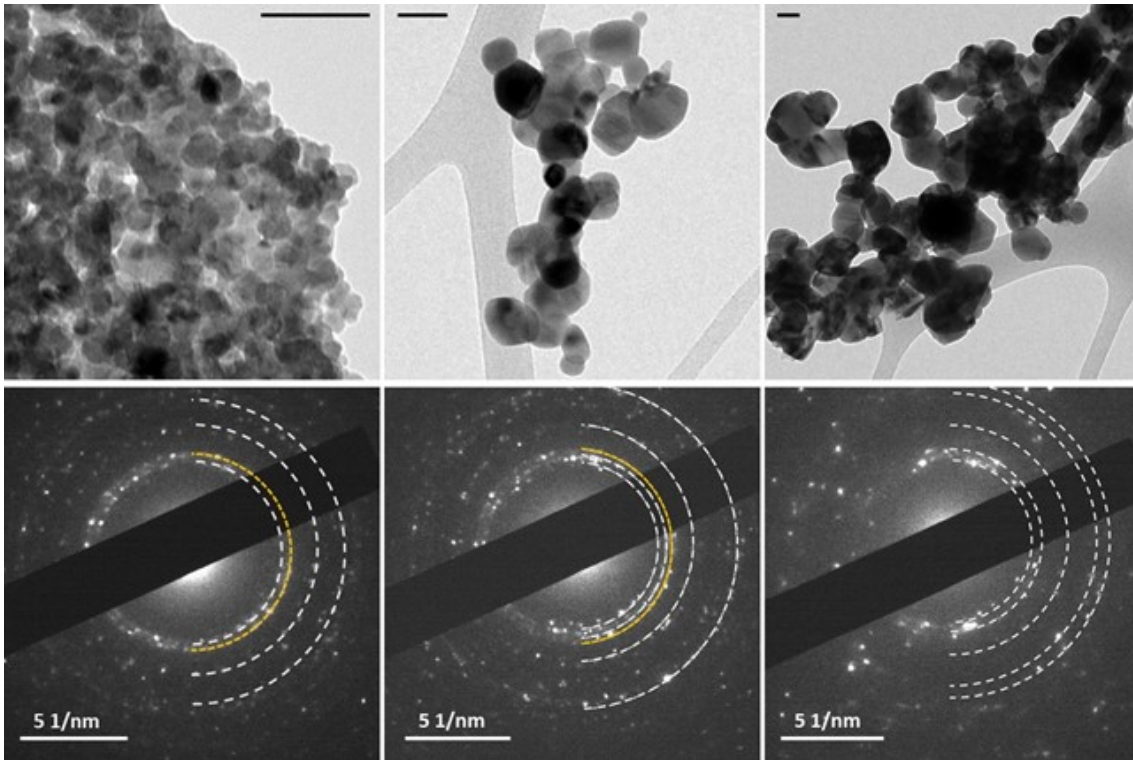

**Figure S1.** (top row) TEM micrographs of samples (left)  $\text{Cu}_2\text{O}/\text{CuO} = 0.42$ , (center)  $\text{Cu}_2\text{O}/\text{CuO} = 0.15$  and (right)  $\text{Cu}_2\text{O}/\text{CuO} = 0.01$ . The scale bar represents 50 nm. (bottom row) The corresponding SAED patterns in which gold rings correspond to  $\text{Cu}_2\text{O}$  while white rings to  $\text{CuO}$ .

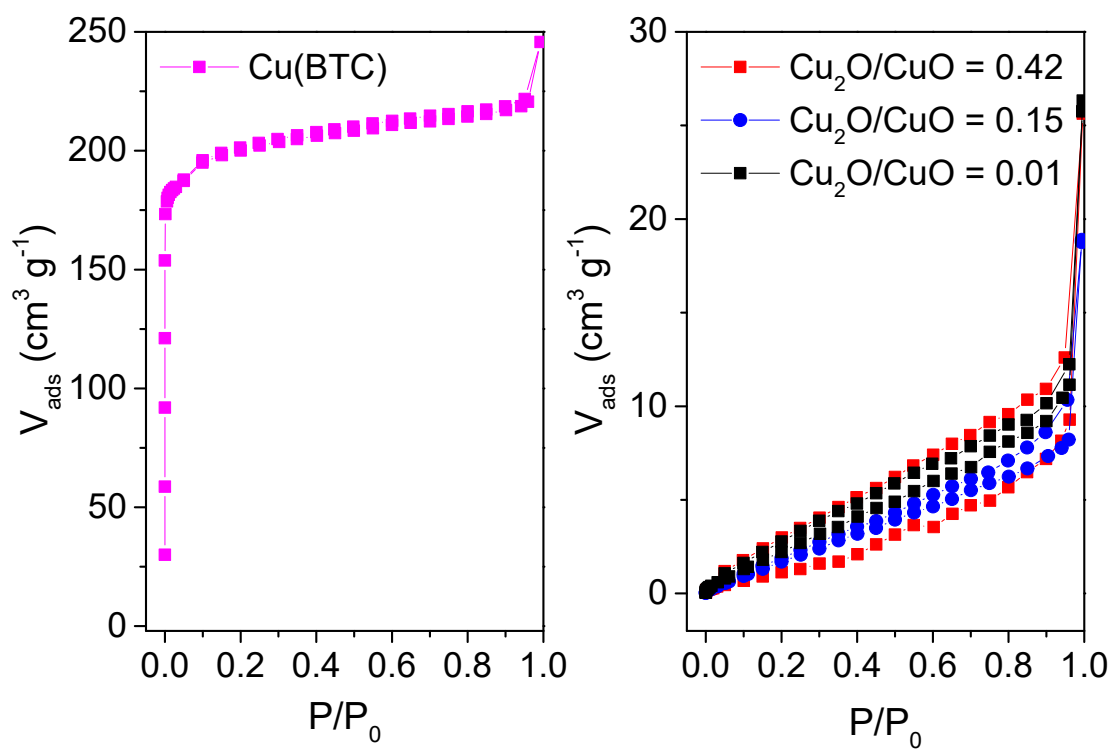

**Figure S2.**  $\text{N}_2$  adsorption/desorption isotherms of the (left) MOF precursor and (right) the different catalysts.

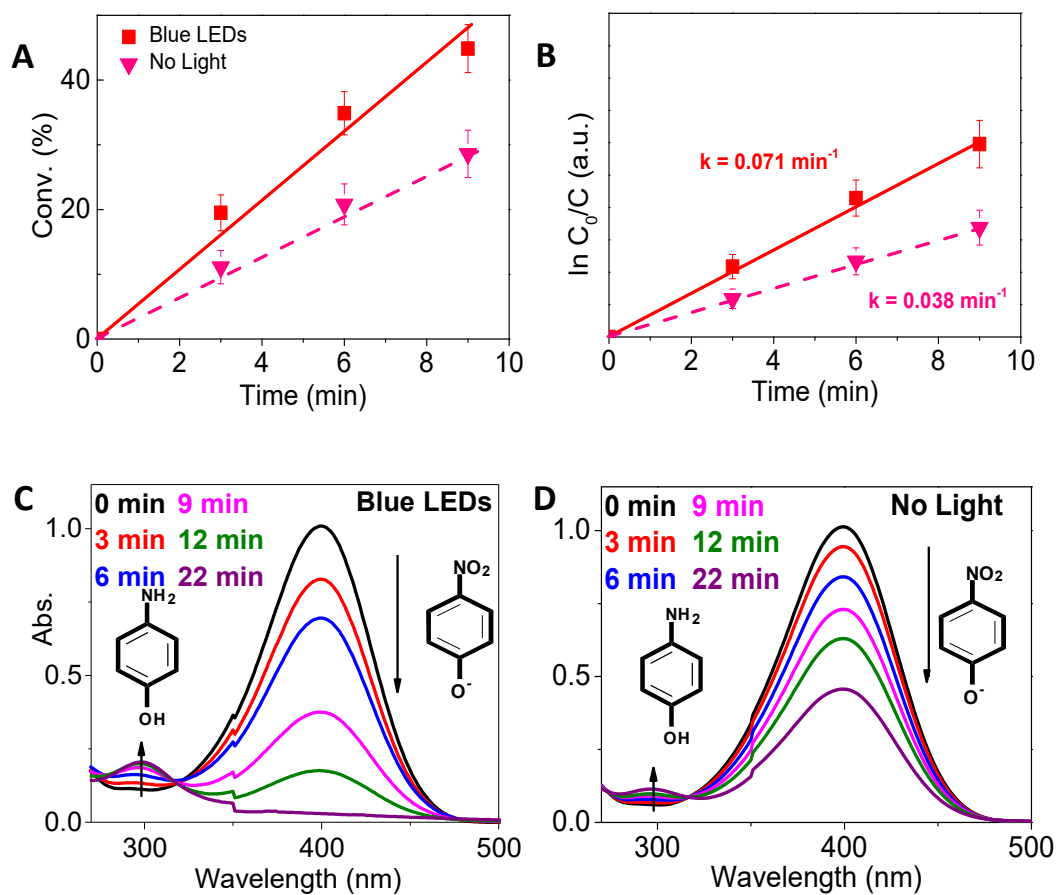

**Figure S3.** Performance of  $\text{Cu}_2\text{O}/\text{CuO} = 0.42$ : (A) Conversion vs Time plot for 4-nitrophenol reduction with and without irradiation in 9 minutes. (B) Rate constant comparison between irradiated and non-irradiated nitroreduction. (C) Uv-vis spectra evolution for 4-nitrophenol photoreduction and (D) reduction. As it has been elsewhere described,[1] at the start of the reaction there is an induction time, ca. 3 min, in which no conversion was found. This is attributed to the rearrangement of the surface atoms of the catalysts. The induction time has been removed from the plots for clarity.

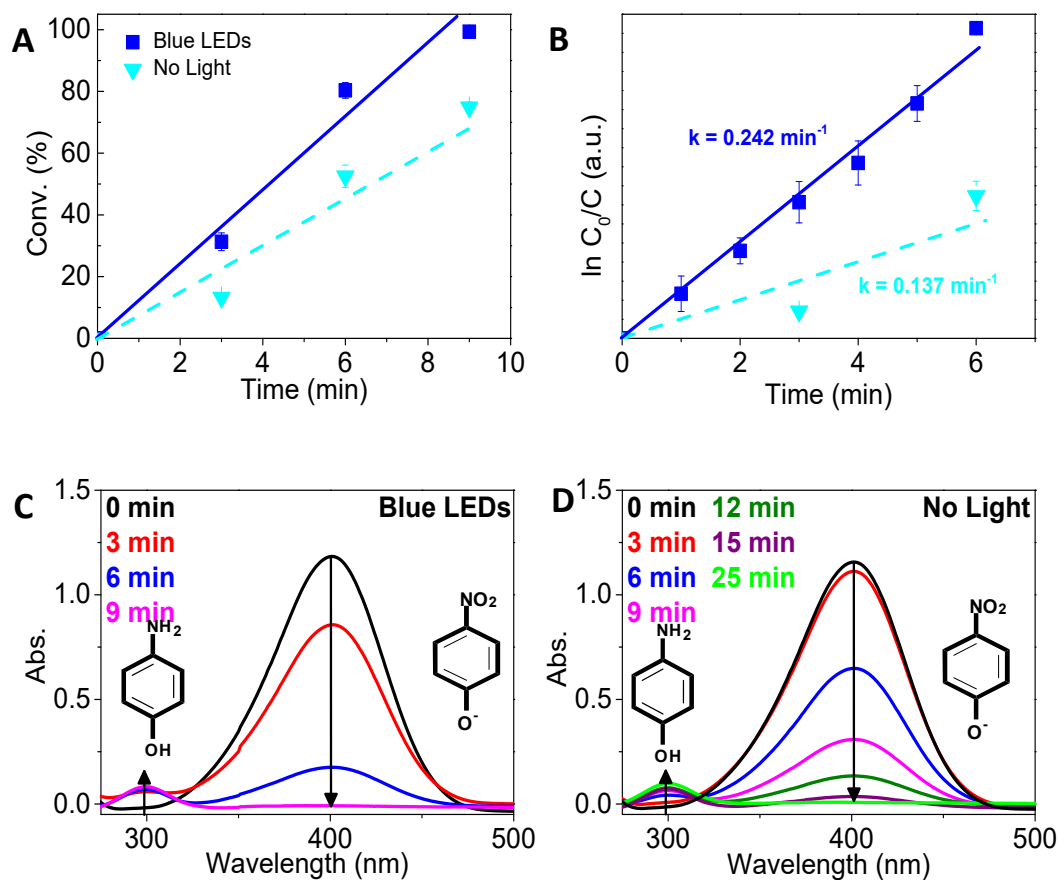

**Figure S4.** Performance of  $\text{Cu}_2\text{O}/\text{CuO} = 0.15$ : (A) Conversion vs Time plot for 4-nitrophenol reduction with and without irradiation in 9 minutes. (B) Rate constant comparison between irradiated and non-irradiated nitroreduction. (C) Uv-vis spectra evolution for 4-nitrophenol photoreduction and (D) reduction. As it has been elsewhere described,[1] at the start of the reaction there is an induction time, ca. 3 min, in which no conversion was found. This is attributed to the rearrangement of the surface atoms of the catalysts. The induction time has been removed from the plots for clarity.

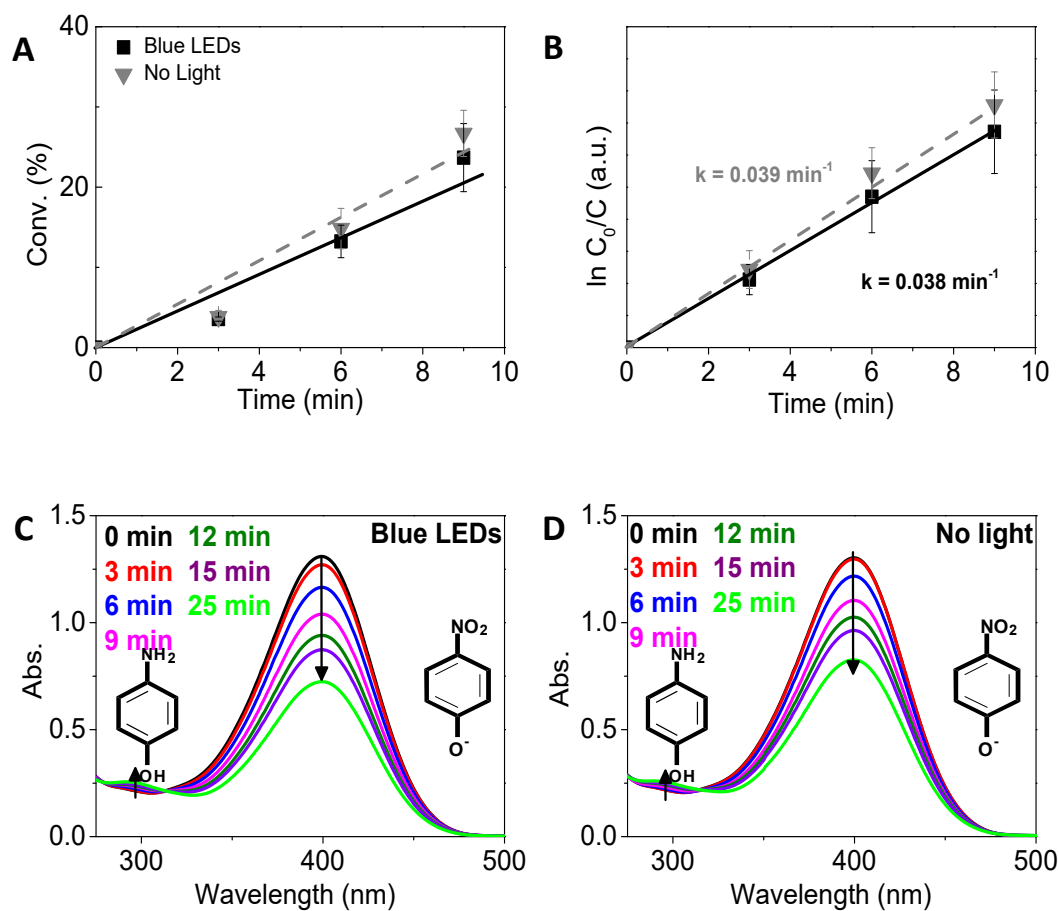

**Figure S5.** Performance of  $\text{Cu}_2\text{O}/\text{CuO} = 0.01$ : (A) Conversion vs Time plot for 4-nitrophenol reduction with and without irradiation in 9 minutes. (B) Rate constant comparison between irradiated and non-irradiated nitroreduction. (C) Uv-vis spectra evolution for 4-nitrophenol photoreduction and (D) reduction. As it has been elsewhere described,[1] at the start of the reaction there is an induction time, ca. 3 min, in which no conversion was found. This is attributed to the rearrangement of the surface atoms of the catalysts. The induction time has been removed from the plots for clarity.

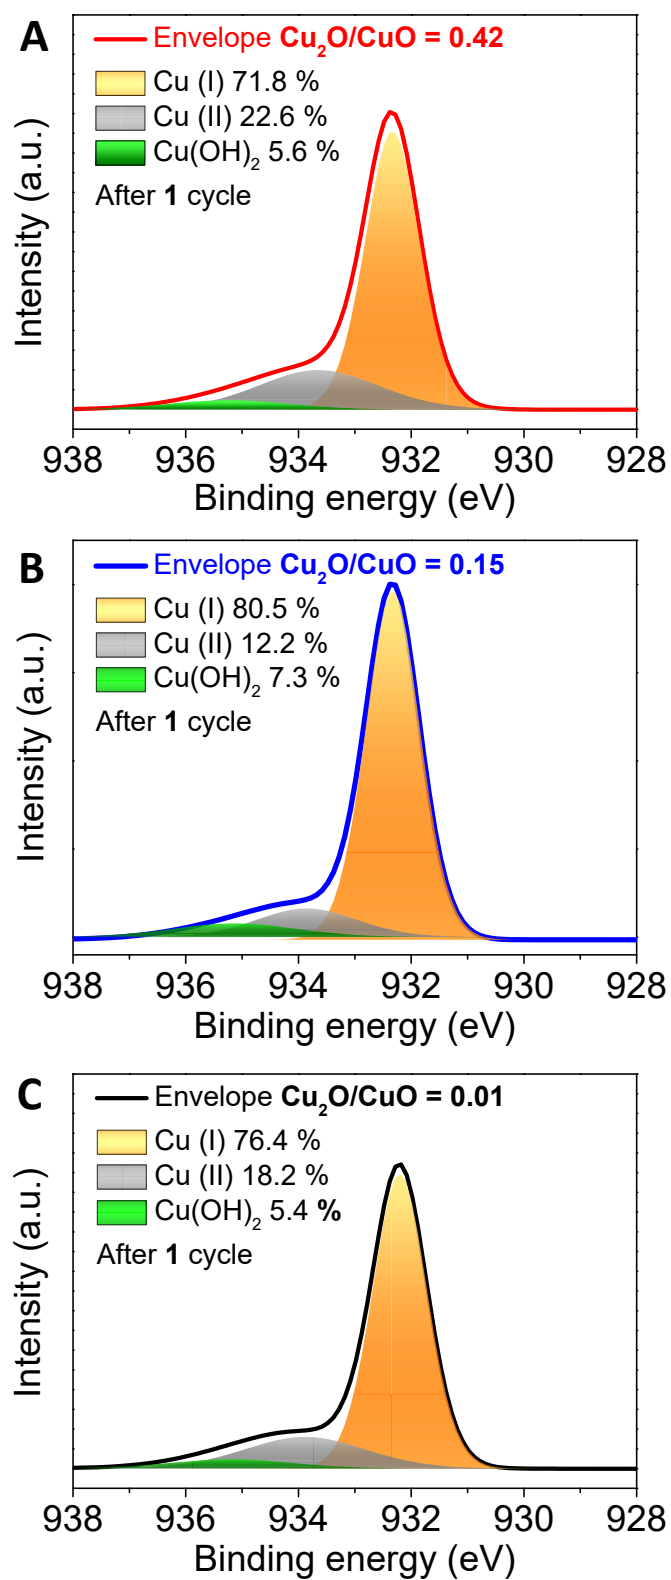

**Figure S6.**  $\text{Cu}2p_{3/2}$  spectra of each catalyst after one photocatalytic cycle. (A)  $\text{Cu}_2\text{O}/\text{CuO} = 0.42$ ; (B)  $\text{Cu}_2\text{O}/\text{CuO} = 0.15$ ; (C)  $\text{Cu}_2\text{O}/\text{CuO} = 0.01$ .



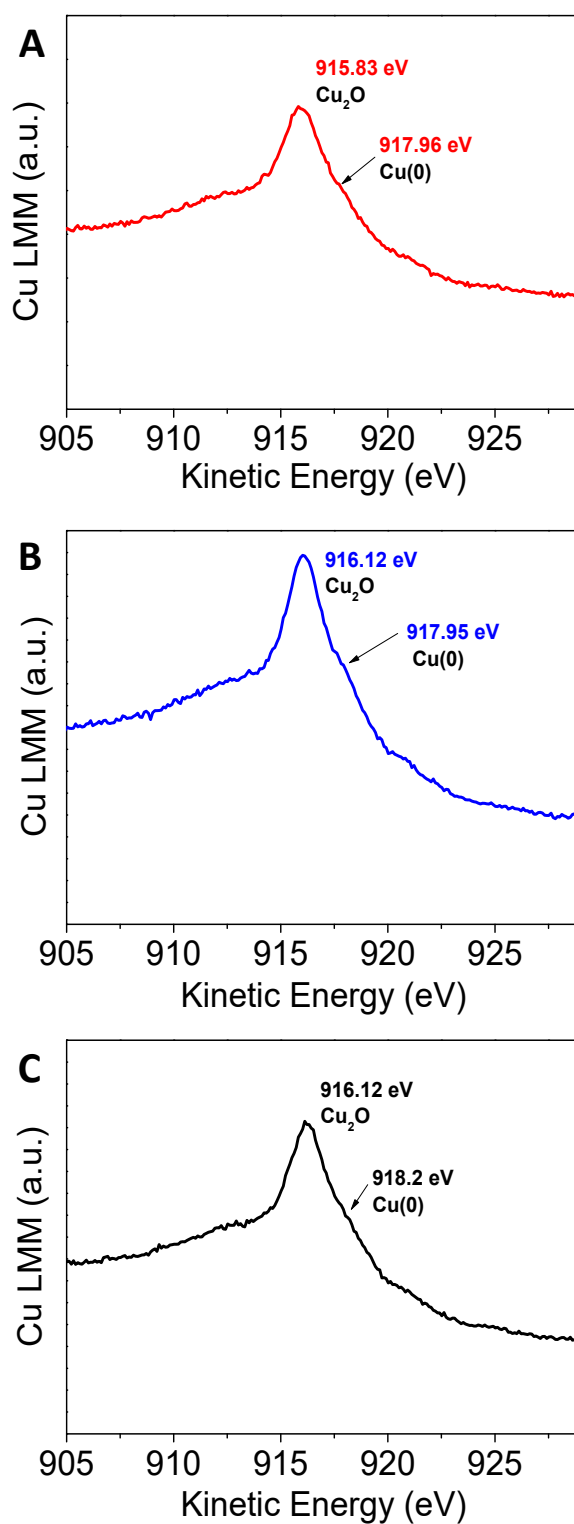

**Figure S7.** Cu LMM spectra of the catalysts after 1 cycle of photoreduction. (A)  $\text{Cu}_2\text{O}/\text{CuO} = 0.42$ ; (B)  $\text{Cu}_2\text{O}/\text{CuO} = 0.15$ ; (C)  $\text{Cu}_2\text{O}/\text{CuO} = 0.01$ . In the 3 spectra a well-defined peak can be observed around 916 eV with a small shoulder peak at 918 eV. The peak at 916 is attributed to  $\text{Cu}_2\text{O}$  and the shoulder at 918 is due to a small amount of metallic copper present in the samples.[2]

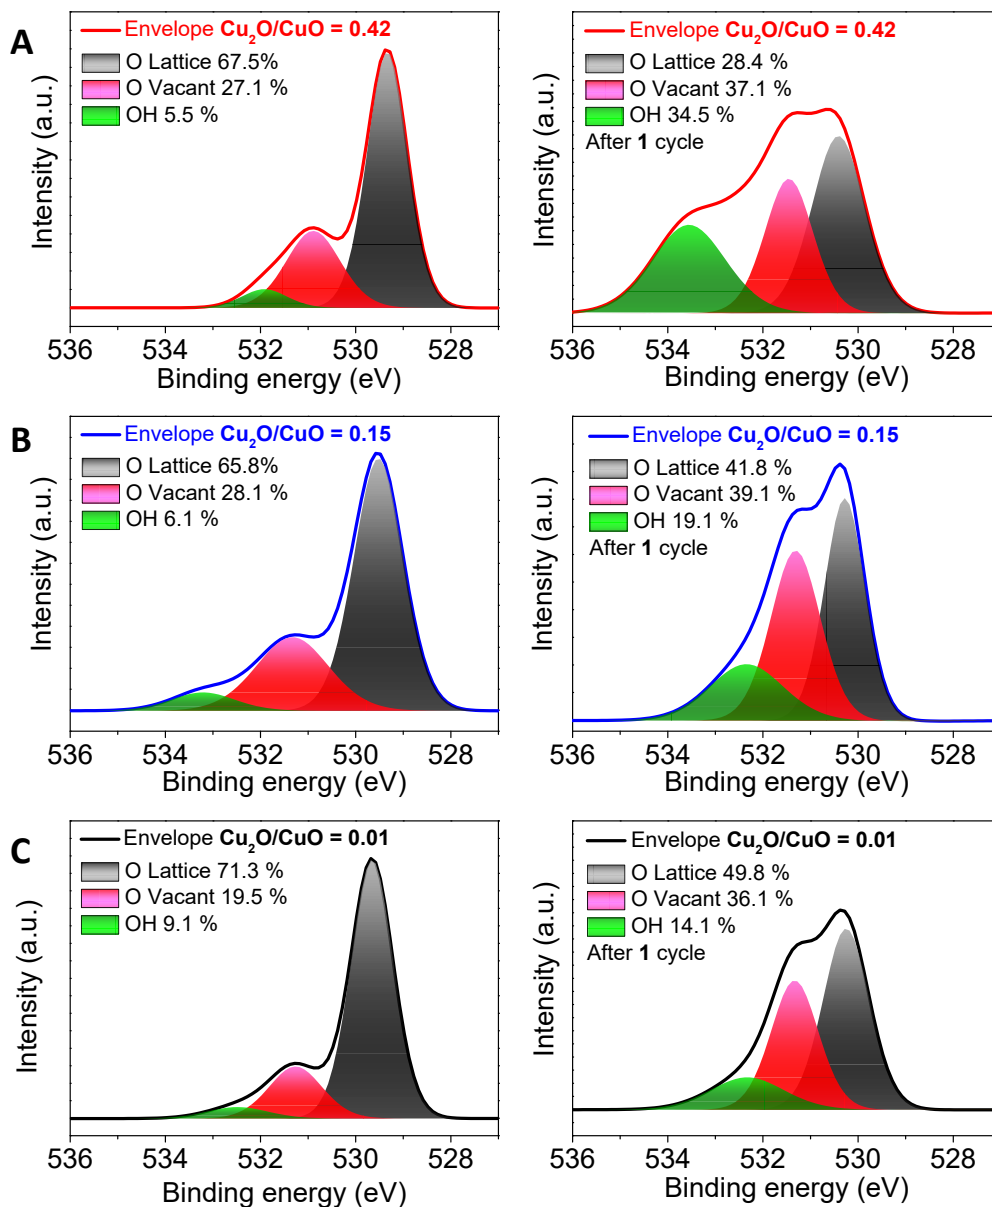

**Figure S8.** O1s XPS spectra of: (A)  $\text{Cu}_2\text{O}/\text{CuO} = 0.42$ , (B)  $\text{Cu}_2\text{O}/\text{CuO} = 0.15$  and (C)  $\text{Cu}_2\text{O}/\text{CuO} = 0.01$  before (left) and after (right) one photocatalytic cycle.

**Table S1.** Variation of distribution of oxygen on the catalysts' surface after 1 photocatalytic cycle. Data obtained through O1s XPS spectra deconvolution.

|                                         | Initial |        |        | 1 <sup>st</sup> cycle |        |        |
|-----------------------------------------|---------|--------|--------|-----------------------|--------|--------|
|                                         | Lattice | Vacant | OH     | Lattice               | Vacant | OH     |
| $\text{Cu}_2\text{O}/\text{CuO} = 0.42$ | 67.5 %  | 27.1 % | 05.5 % | 28.4 %                | 37.1 % | 34.5 % |
| $\text{Cu}_2\text{O}/\text{CuO} = 0.15$ | 65.8 %  | 28.1 % | 06.1 % | 41.8 %                | 39.1 % | 19.1 % |
| $\text{Cu}_2\text{O}/\text{CuO} = 0.01$ | 71.3 %  | 19.5 % | 09.1 % | 49.8 %                | 36.1 % | 14.1 % |

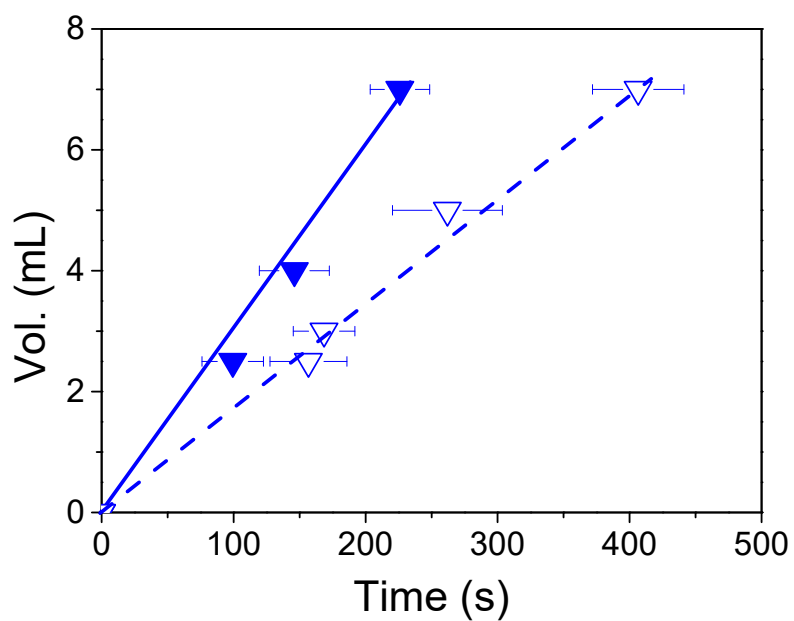

**Figure S9.** Volume of generated H<sub>2</sub> vs time plot using Cu<sub>2</sub>O/CuO = 0.15 as catalyst. Solid line is for blue LEDs irradiated hydrolysis and dashed for non-irradiated.

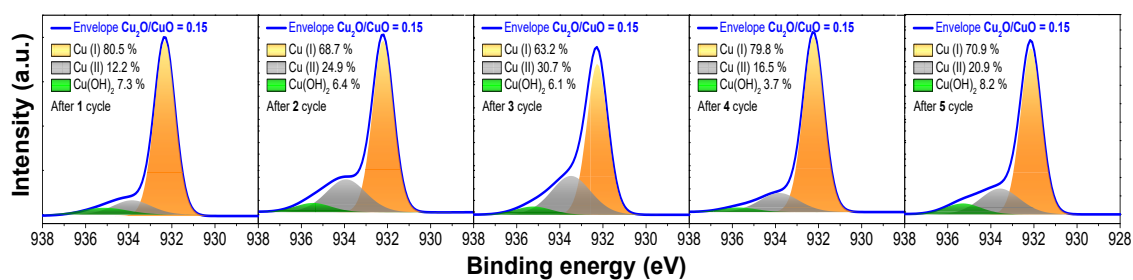

**Figure S10.** XPS Cu<sub>2</sub>p<sub>3</sub> spectra of the best performing catalyst after each catalytic cycle.

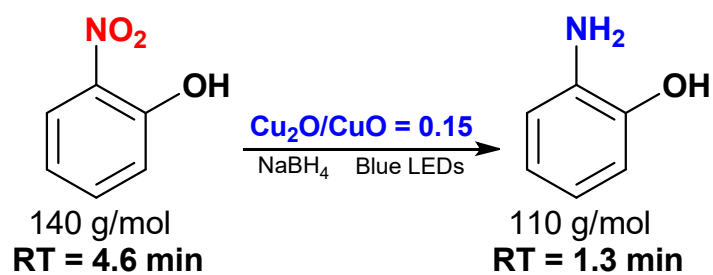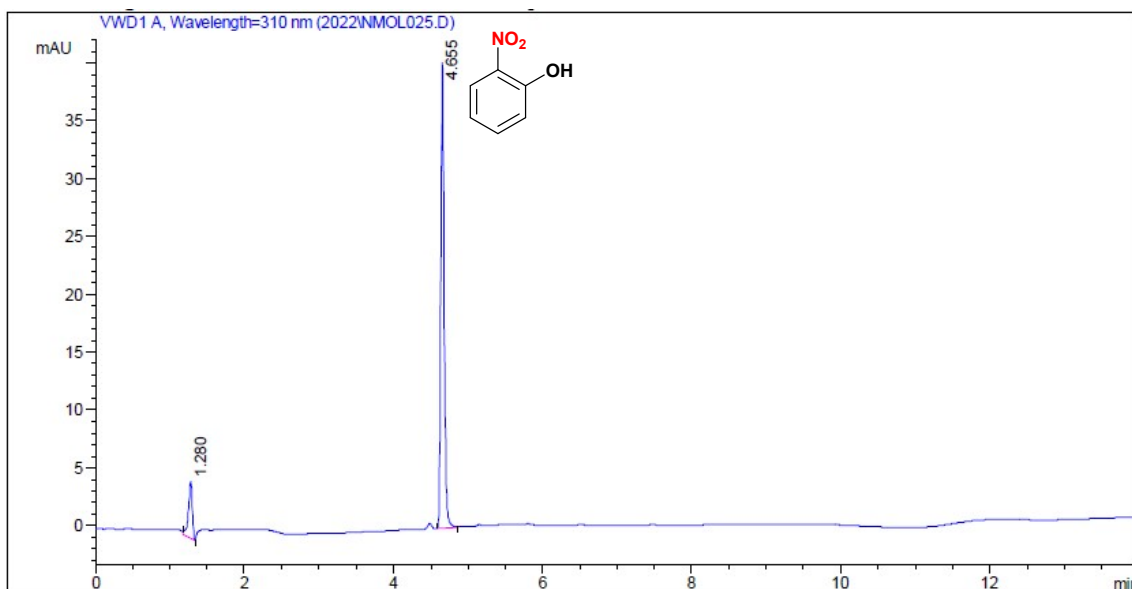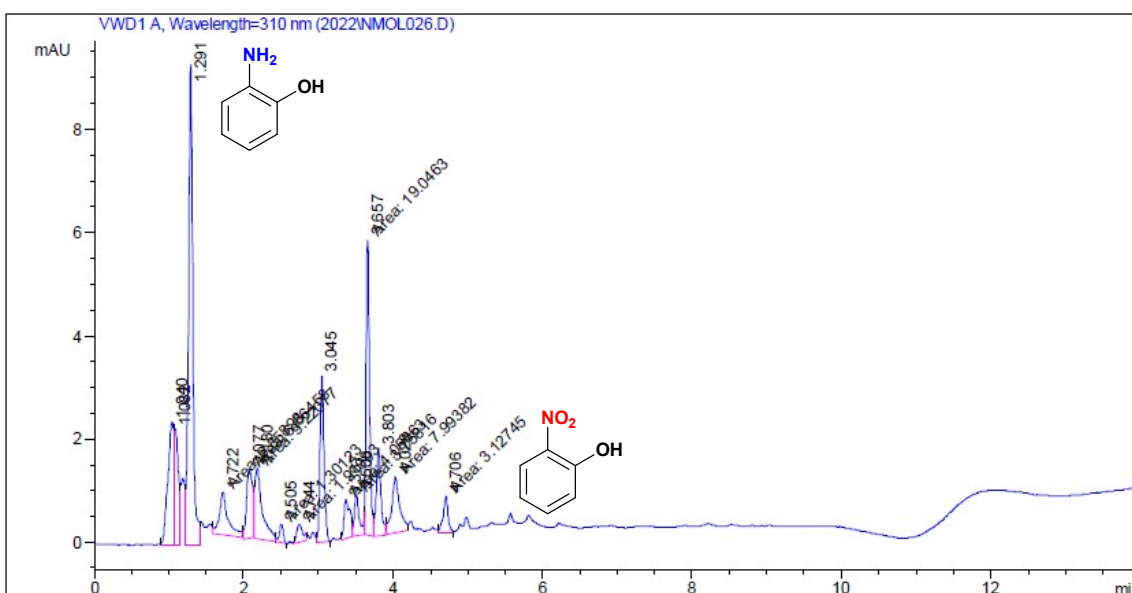

**Figure S11.** 2-nitrophenol 12 minutes photoreduction to 2-aminophenol. Chromatograms obtained from HPLC-MS of samples taken before photoreduction (above) and after reaction (below).

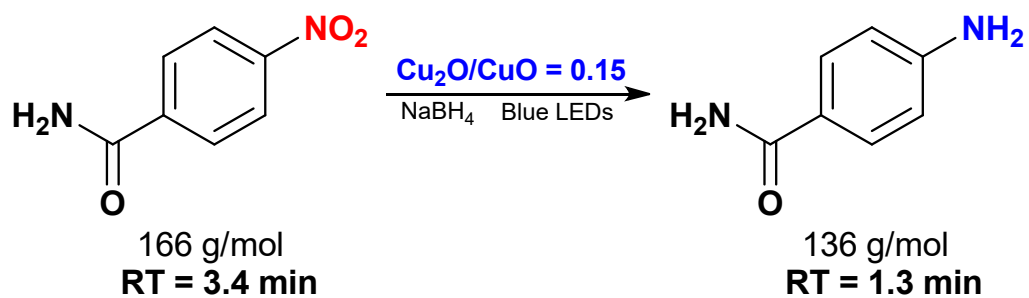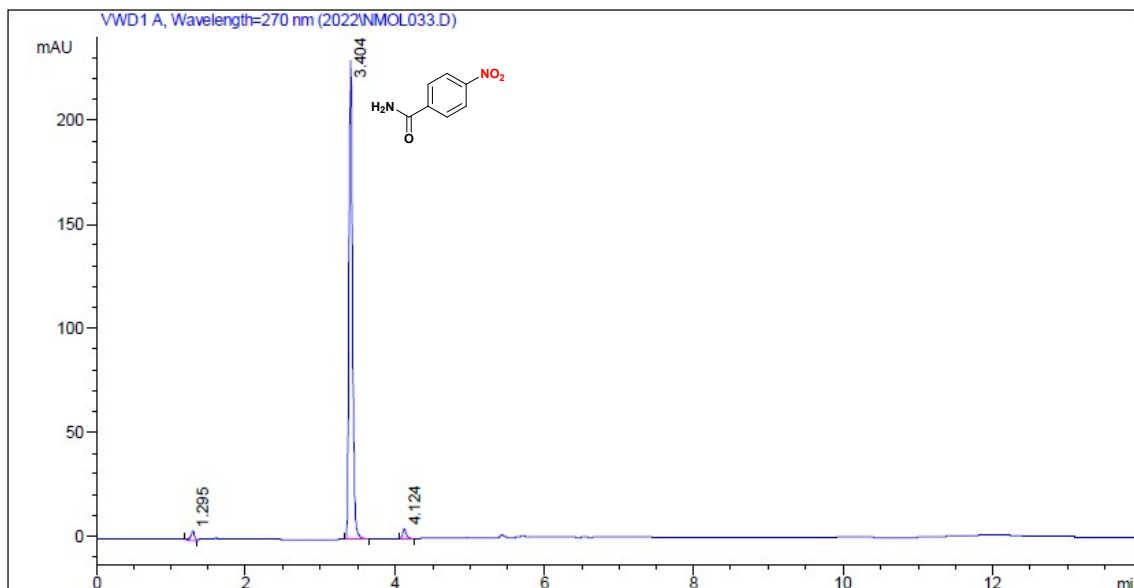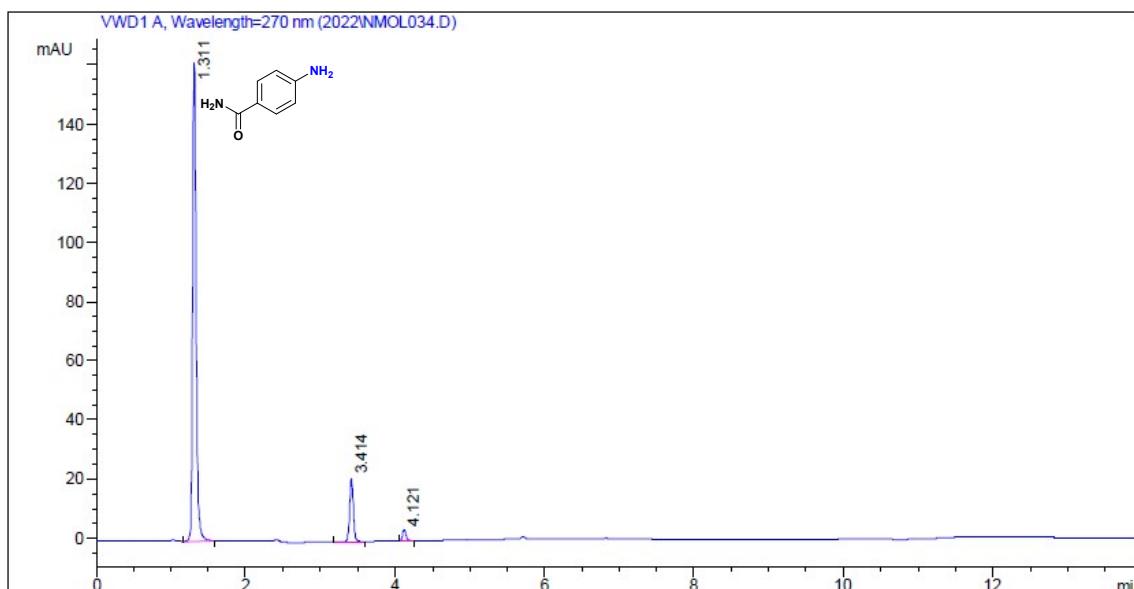

**Figure S12.** 4-nitrobenzamide 12 minutes photoreduction to 4-aminebenzamide. Chromatograms obtained from HPLC-MS of samples taken before photoreduction (above) and after reaction (below).

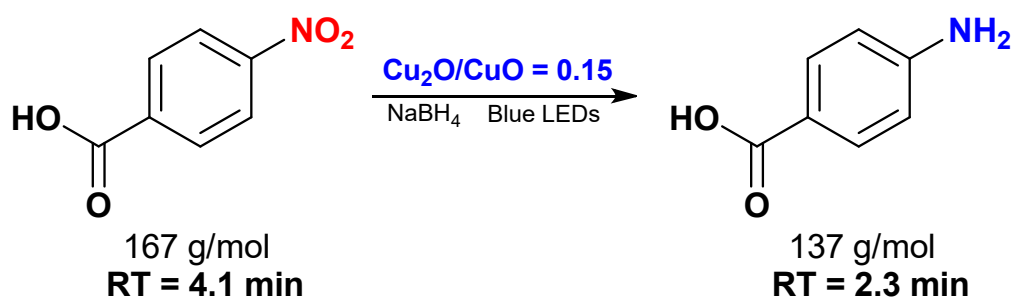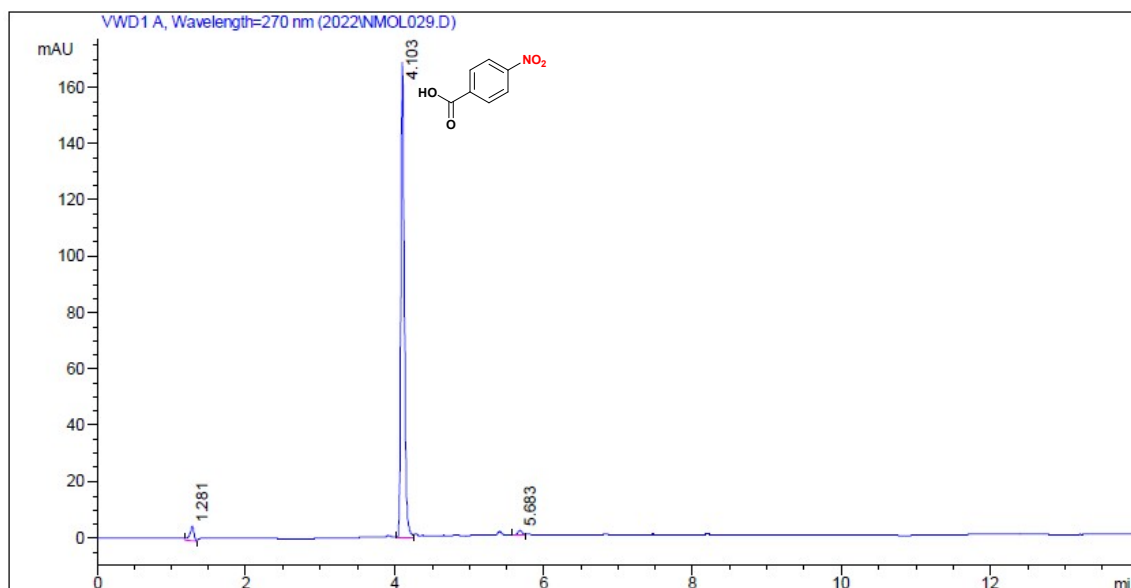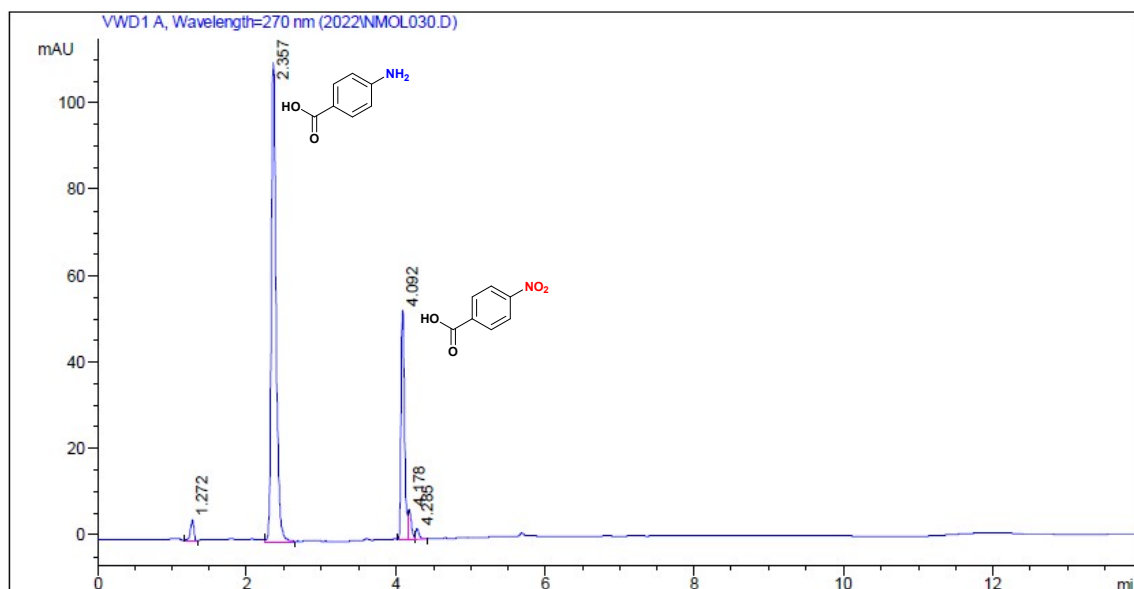

**Figure S13.** 4-nitrobenzoic acid 12 minutes photoreduction to 4-aminobenzoic acid. Chromatograms obtained from HPLC-MS of samples taken before photoreduction (above) and after reaction (below).

## References

- [1] T. Aditya, A. Pal, T. Pal, Nitroarene reduction: A trusted model reaction to test nanoparticle catalysts, *Chem. Commun.* 51 (2015) 9410–9431. <https://doi.org/10.1039/c5cc01131k>.
- [2] P. S. and M. B. S. Poulston, P. M. Parlett, Surface Oxidation and Reduction of CuO and Cu<sub>2</sub>O Studied Using XPS and XAES, *Surf. Interface Anal.* 24 (1996) 811–820. [https://doi.org/10.1002/\(SICI\)1096-9918\(199611\)24:12<811::AID-SIA191>3.0.CO;2-Z](https://doi.org/10.1002/(SICI)1096-9918(199611)24:12<811::AID-SIA191>3.0.CO;2-Z)
